# Supplementary material
Source: HighWire-hosted journal article supplement (https://jitc.bmj.com/content/11/4/e006365)
Supplement: inline-supplementary-material-2 [file inline-supplementary-material-2.pdf]

**Supplementary Table 2. CAR-T related toxicities.** Characteristics of the CAR-T related toxicities at their onset of the patients with “Tox-onset” and “Post-IMT” samples.

|                                              | N (%) (n= 19) |
|----------------------------------------------|---------------|
| <b>CRS</b>                                   | 19 (100)      |
| <b>Grade</b>                                 |               |
| Grade 1                                      | 3 (15.8)      |
| Grade 1 persistent                           | 6 (31.6)      |
| Grade 2                                      | 7 (36.8)      |
| Grade 3                                      | 2 (10.5)      |
| Grade 4                                      | 1 (5.3)       |
| <b>Clinical features</b>                     |               |
| Hypotension                                  | 6 (31.6)      |
| Need for vasopressors                        | 2 (10.5)      |
| Hypoxemia                                    | 7 (36.8)      |
| Need for FiO <sub>2</sub> >40%               | 1 (5.3)       |
| <b>Treatment</b>                             |               |
| Immunomodulatory treatment for CRS (yes)     | 16 (84.2)     |
| Tocilizumab                                  | 16 (84.2)     |
| Doses of tocilizumab (median± IQR)           | 1.5 ± 1       |
| Refractoriness to tocilizumab (yes)          | 3 (15.8)      |
| Siltuximab                                   | 1 (5.3)       |
| Corticosteroids                              | 2 (10.5)      |
| <b>ICANS</b>                                 | 8 (42.1)      |
| <b>Grade</b>                                 |               |
| Grade 1                                      | 2 (10.5)      |
| Grade 2                                      | 2 (10.5)      |
| Grade 3                                      | 1 (5.3)       |
| Grade 4                                      | 3 (15.8)      |
| <b>Treatment</b>                             |               |
| Immunomodulatory treatment for ICANS (yes)   | 8 (42.1)      |
| Corticosteroids                              | 8 (42.1)      |
| Duration corticosteroids (days, median± IQR) | 22 ± 37.2     |
| Refractoriness to corticosteroids            | 1 (5.3)       |
| Siltuximab                                   | 1 (5.3)       |
| Anakinra                                     | 1 (5.3)       |

Tox-onset: Sample at the onset of the toxicity. Post-IMT: sample within the first 24-48h after the immunomodulatory treatment. IMT: immunomodulatory treatment. CRS: cytokine release syndrome; ICANS: Immune effector cell-associated neurotoxicity syndrome; FiO<sub>2</sub>: fraction of inspired oxygen; IQR: interquartile range.
