# Supplementary material
Source: HighWire-hosted journal article supplement (https://jitc.bmj.com/content/11/4/e006365)

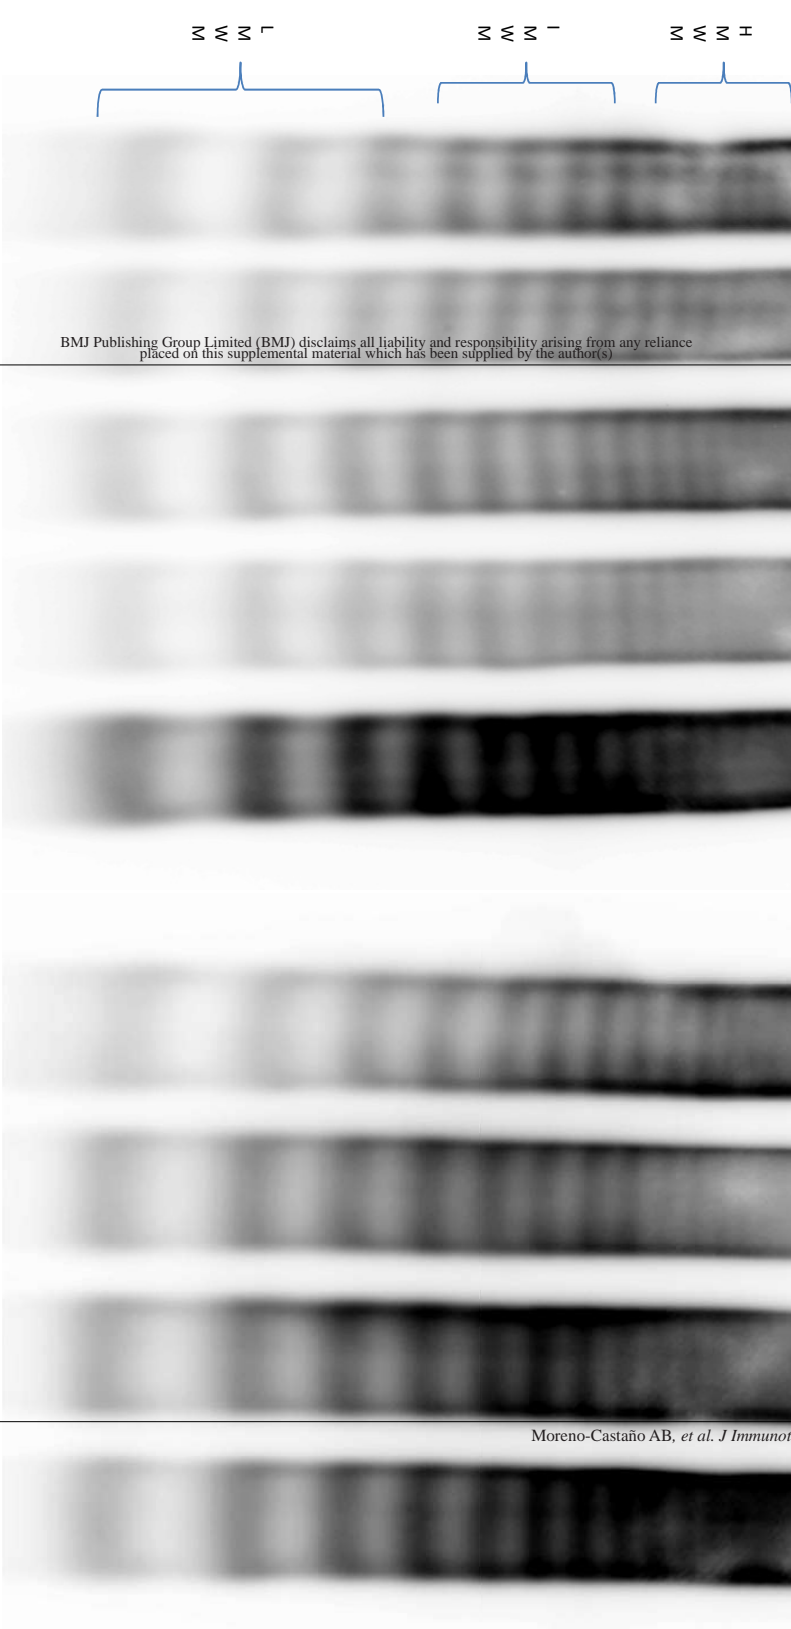

Supplement: inline-supplementary-material-6 [file inline-supplementary-material-6.pdf]
